# Supplementary material
Source: Springer Nature journal article supplement (https://www.springermedizin.de/resource/supplementary/13012_2013_691_MOESM1_ESM.pdf/9630246)
Supplement: MOESM1 [file 9630246]

## Additional File 1: Items linked to the TDF

| Psychological Domain (abbreviated) | Barrier or lever to hand hygiene (HH)                                                                                                                                                                                                                                                                                                                                                                                                                                                                                                                                                                                                                                                                                                                                                                                                                                                                                                                                                                                                                                                                                                                                                             |
|------------------------------------|---------------------------------------------------------------------------------------------------------------------------------------------------------------------------------------------------------------------------------------------------------------------------------------------------------------------------------------------------------------------------------------------------------------------------------------------------------------------------------------------------------------------------------------------------------------------------------------------------------------------------------------------------------------------------------------------------------------------------------------------------------------------------------------------------------------------------------------------------------------------------------------------------------------------------------------------------------------------------------------------------------------------------------------------------------------------------------------------------------------------------------------------------------------------------------------------------|
| 1 Knowledge                        | <p>E learning about HH<br/>           Don't believe that HH reduces infections in hospitals<br/>           Information for patients improves their HH<br/>           Adverts relating to HH inform practice<br/>           A HH newsletter helps improve practice<br/>           Advice from occupational health regarding sore hands improves HH<br/>           Basic training does not cover HH sufficiently<br/>           Training lag – staff are insufficiently trained for specialist posts<br/>           Available HH guidelines</p>                                                                                                                                                                                                                                                                                                                                                                                                                                                                                                                                                                                                                                                     |
| 2 Skills                           | <p>Not computer literate<br/> <b>HH training is tailored to professional group and need</b> <small>appears also in professional role</small><br/>           Good HH training helps</p>                                                                                                                                                                                                                                                                                                                                                                                                                                                                                                                                                                                                                                                                                                                                                                                                                                                                                                                                                                                                            |
| 3 Professional Role                | <p>HH is embedded into professional practice<br/>           HH is a non negotiable part of the job<br/>           Some professional groups are more likely to clean hands than others<br/>           Respect for patient improves HH<br/>           Board to ward responsibility improves practice<br/> <b>HH training is tailored to professional group and need</b> <small>appears also in skills</small><br/>           HH is better when the practitioner takes pride in their work<br/> <b>Professional culture influences HH</b> <small>appears also in professional role</small></p>                                                                                                                                                                                                                                                                                                                                                                                                                                                                                                                                                                                                       |
| 4 Beliefs about Capabilities       | <p>A confidence in HH ability aids good practice<br/>           Full hands e.g. carrying equipment makes HH difficult<br/>           It is impossible to do HH as frequently as needed<br/>           Afraid to ask others to carry out HH</p>                                                                                                                                                                                                                                                                                                                                                                                                                                                                                                                                                                                                                                                                                                                                                                                                                                                                                                                                                    |
| 5 Beliefs about Consequences       | <p>Sore hands reduces HH<br/>           Patient may catch an infection and die if HH omitted<br/>           HH carried out to prevent and infection to self<br/>           Fear of disciplinary action of HH not carried out<br/>           HH carried out to prevent complaint from patient<br/>           The thought of cost of infections in hospital improves HH<br/>           HH creates patient confidence<br/> <b>Criticised when HH missed</b> <small>appears also in social influences</small><br/> <b>Good attitude promotes HH</b> <small>appears also in motivation and goals</small><br/>           HH avoids getting a bad reputation<br/>           Name and shame – being made an example of if HH is omitted<br/>           Challenged when HH not carried out<br/>           There is zero tolerance to poor HH<br/>           A certificate for good HH<br/>           Using the “glow and show” light box identifies unclean hands and influences HH<br/>           The organisation would lose status if HH not carried out<br/>           Don't want to feel responsible for infecting patient so carry out HH<br/>           Blame from others if HH not carried out</p> |

|                           |                                                                                                                                                                                                                                                                                                                                                                                                                                                                                                                                                                                                                                                                                                                                                                    |
|---------------------------|--------------------------------------------------------------------------------------------------------------------------------------------------------------------------------------------------------------------------------------------------------------------------------------------------------------------------------------------------------------------------------------------------------------------------------------------------------------------------------------------------------------------------------------------------------------------------------------------------------------------------------------------------------------------------------------------------------------------------------------------------------------------|
|                           | Self-blame if HH omitted                                                                                                                                                                                                                                                                                                                                                                                                                                                                                                                                                                                                                                                                                                                                           |
| 6 Motivation and goals    | <p>More important things to do than HH</p> <p>Enthusiastic about HH</p> <p>Good intentions result in better HH</p> <p><b>Good attitude promotes HH</b> <small>appears also in consequences</small></p> <p>Belief that HH is not important</p> <p>Complacent about HH</p> <p>Emergencies and other priorities prevent HH</p> <p>HH is a priority</p> <p>Disagree with HH guidelines</p> <p>Can't be bothered to carry out HH</p>                                                                                                                                                                                                                                                                                                                                    |
| 7 Memory and attention    | <p>Forgets HH</p> <p>It is automatic to clean hands</p> <p><b>Infection promotion notice boards prompt HH</b> <small>appears also in environmental resources</small></p> <p>HH is a good habit</p> <p>Forget HH when tired</p> <p>Infection promotion notice boards inform HH</p> <p>Adverts relating to HH prompt practice</p>                                                                                                                                                                                                                                                                                                                                                                                                                                    |
| 8 Environmental resources | <p>Type of ward environment</p> <p>Necessary equipment is too expensive</p> <p>There are not enough sinks for good HH</p> <p>Facilities are inadequate for HH</p> <p>Some government policies make HH difficult (e.g. bed occupancy)</p> <p>Hand cream encourages HH</p> <p>Gel is always available</p> <p>A cluttered environment prohibits HH</p> <p>Inefficient systems of care inhibit HH</p> <p><b>Infection promotion notice boards prompt HH</b> <small>appears also in memory and attention</small></p> <p>Staff/skill mix is important if HH is to be carried out</p> <p>No time to attend HH courses</p> <p>Working in more than one area makes HH difficult (e.g. hospital and community based)</p> <p>Poor staffing levels make HH difficult</p>       |
| 9 Social influences       | <p>Strong leadership makes HH more likely</p> <p>Reluctant to let the team down by omitting HH</p> <p>Positive ward culture increases the likelihood of HH</p> <p>The influence of peer pressure leads to better HH</p> <p>HH champions help with HH compliance</p> <p>Patients expect good HH from staff</p> <p>Supervision from seniors improves HH</p> <p>Opinion leaders promote HH</p> <p><b>Criticised when HH missed</b> <small>appears also in consequences</small></p> <p>Praise makes HH more likely</p> <p>The reintroduction of Matrons improves HH</p> <p>Infection prevention and control teams influence HH</p> <p>A practitioner (link) is responsible for communicating with the infection prevention team</p> <p>Good role models improve HH</p> |

|                 |                                                                                                                                                                                                                                                                                                                                            |
|-----------------|--------------------------------------------------------------------------------------------------------------------------------------------------------------------------------------------------------------------------------------------------------------------------------------------------------------------------------------------|
|                 | <p>Encouragement helps HH compliance<br/>         Nobody else bothers with HH<br/> <b>Professional culture influences HH</b> appears also in professional role<br/>         Reluctant to prompt senior staff with HH<br/>         Managers and the IPC team are very motivating with HH</p>                                                |
| 10 Emotion      | <p>Fear of ward closure due to infection if HH omitted<br/>         Anticipated guilt or regret if hands are not cleaned<br/>         Feel guilty if HH omitted<br/>         Feel ashamed if HH omitted<br/>         Frustrated when others omit HH<br/>         Embarrassed to fail HH audit<br/>         Angry if HH not carried out</p> |
| 11 Action Plans | <p>Several improvement strategies at the same time make HH more likely<br/>         Government and organisational targets mean HH is more likely<br/>         Audit and feedback improves HH</p>                                                                                                                                           |
